# Supplementary material for: Targetable lesions and proteomes predict therapy sensitivity through disease evolution in pediatric acute lymphoblastic leukemia
Source: PubMed Central journal article supplement (PMC10663560; doi:10.1038/s41467-023-42701-9), 2023-11-21
Supplement: 41467_2023_42701_MOESM3_ESM.pdf [file 41467_2023_42701_MOESM3_ESM.pdf]

## Description of Additional Supplementary Files

File Name: Supplementary Data 1  
Description: BCCH Cohort description

File Name: Supplementary Data 2  
Description: BCCH Genomic Data

File Name: Supplementary Data 3  
Description: SJH Genomic Data

File Name: Supplementary Data 4  
Description: Genomics Progression-Summarized progression analysis of genomic lesions for BCCH and SJH cohorts

File Name: Supplementary Data 5  
Description: BCCH-SJH Targets-Summarized druggable events for BCCH and SJH cohorts

File Name: Supplementary Data 6  
Description: Cohort-Batch Corrected- Full proteome cohort protein intensities postbatch correction

File Name: Supplementary Data 7  
Description: Full Cohort-filtered and imputed- Full proteome cohort protein intensities post-batch correction, filtered and imputed

File Name: Supplementary Data 8  
Description: Variable Protein Lists- Supplementary Table S8 variable protein lists used for heatmaps in figure 2 (B&C)

File Name: Supplementary Data 9  
Description: B-ALL protein clusters GO

File Name: Supplementary Data 10  
Description: Protein Intensities- unfiltered and unimputed- Initial export from Spectronaut of normalized protein intensities prior to filtering and imputation

File Name: Supplementary Data 11  
Description: Protein Intensities- filtered and imputed

File Name: Supplementary Data 12  
Description: Stats- Paired Summary- Summary of results for statistical analysis of equivalence and difference for paired samples

File Name: Supplementary Data 13  
Description: GO equivalent

File Name: Supplementary Data 14

Description: Paired-different log<sub>2</sub>FC- Summary of log<sub>2</sub>FC for the proteins that were significantly different in any pair

File Name: Supplementary Data 15

Description: B-cell Analysis- B-cell development transcription factors

File Name: Supplementary Data 16

Description: Cancer Associated Proteins

File Name: Supplementary Data 17

Description: CAP LIMMA

File Name: Supplementary Data 18

Description: RNA-seq BCCH Cohort

File Name: Supplementary Data 19

Description:: RNA-seq TARGET Cohort
